# Supplementary material for: Prevalence of Self-Reported Work-Related Lower Back Pain and Its Associated Factors in Ethiopia: A Systematic Review and Meta-Analysis
Source: J Environ Public Health. 2021 Sep 23;2021:6633271. doi: 10.1155/2021/6633271 (PMC8486508; doi:10.1155/2021/6633271)
Supplement: Supplementary Materials — The methodological quality of the included studies was assessed using “Newcastle-Ottawa Quality Assessment Tool Adapted for Cross-Sectional Studies” shown in Additional file 1. The search strategy and results obtained using PubMed are shown in Additional file 2. [file 6633271.f1.zip]

Archive with 2 entries (2 files):
- 6633271.f1/Additional file 1.docx
- 6633271.f1/Additional File 2.docx
